# Supplementary material for: A network analysis of academic burnout and its psychosocial correlates: Self-compassion, teacher support, and family cohesion among Chinese middle and high school students
Source: Research Square preprint supplement (doi:10.21203/rs.3.rs-7325995/v1), 2025-09-23
Supplement: Supplementary file 1 [file b14531fdb2a631d2d2c7fab9.docx]

Appendix A

*Table S1*. The comparison of edge weights across two networks.

| Node | | Weight 1 | Weight 2 | *p* | Bonferroni *p* |
| --- | --- | --- | --- | --- | --- |
| ASBI_Exh | ASBI_Cyn | 0.35 | 0.35 | 0.999 | 1 |
| ASBI_Exh | ASBI_RE | 0.00 | 0.00 | 1 | 1 |
| ASBI_Cyn | ASBI_RE | 0.32 | 0.25 | 0.219 | 1 |
| ASBI_Exh | SCS_Mdf | 0.00 | 0.00 | 1 | 1 |
| ASBI_Cyn | SCS_Mdf | 0.00 | -0.12 | 0.225 | 1 |
| ASBI_RE | SCS_Mdf | -0.24 | -0.14 | 0.091 | 1 |
| ASBI_Exh | SCS_CH | -0.27 | -0.23 | 0.474 | 1 |
| ASBI_Cyn | SCS_CH | -0.09 | 0.00 | 0.798 | 1 |
| ASBI_RE | SCS_CH | -0.09 | -0.16 | 0.698 | 1 |
| SCS_Mdf | SCS_CH | -0.11 | 0.00 | 0.616 | 1 |
| ASBI_Exh | SCS_SK | 0.00 | 0.00 | 1 | 1 |
| ASBI_Cyn | SCS_SK | 0.00 | 0.00 | 1 | 1 |
| ASBI_RE | SCS_SK | 0.00 | 0.00 | 1 | 1 |
| SCS_Mdf | SCS_SK | 0.37 | 0.36 | 0.957 | 1 |
| SCS_CH | SCS_SK | 0.25 | 0.29 | 0.46 | 1 |
| ASBI_Exh | FC | 0.00 | 0.00 | 1 | 1 |
| ASBI_Cyn | FC | -0.11 | 0.00 | 0.56 | 1 |
| ASBI_RE | FC | -0.13 | 0.00 | 0.342 | 1 |
| SCS_Mdf | FC | 0.10 | 0.00 | 0.812 | 1 |
| SCS_CH | FC | 0.12 | 0.00 | 0.532 | 1 |
| SCS_SK | FC | 0.00 | 0.00 | 1 | 1 |
| ASBI_Exh | PTES_Und | 0.00 | 0.00 | 1 | 1 |
| ASBI_Cyn | PTES_Und | 0.00 | 0.00 | 1 | 1 |
| ASBI_RE | PTES_Und | -0.07 | 0.00 | 0.379 | 1 |
| SCS_Mdf | PTES_Und | 0.00 | 0.00 | 1 | 1 |
| SCS_CH | PTES_Und | 0.00 | 0.00 | 1 | 1 |
| SCS_SK | PTES_Und | 0.00 | 0.00 | 1 | 1 |
| FC | PTES_Und | 0.00 | 0.00 | 1 | 1 |
| ASBI_Exh | PTES_Care | 0.00 | 0.00 | 1 | 1 |
| ASBI_Cyn | PTES_Care | 0.00 | 0.00 | 1 | 1 |
| ASBI_RE | PTES_Care | 0.00 | -0.08 | 0.389 | 1 |
| SCS_Mdf | PTES_Care | 0.00 | 0.00 | 1 | 1 |
| SCS_CH | PTES_Care | 0.00 | 0.00 | 1 | 1 |
| SCS_SK | PTES_Care | 0.00 | 0.00 | 1 | 1 |
| FC | PTES_Care | 0.00 | 0.00 | 1 | 1 |
| PTES_Und | PTES_Care | 0.46 | 0.41 | 0.48 | 1 |
| ASBI_Exh | PTES_Rsp | 0.00 | 0.00 | 1 | 1 |
| ASBI_Cyn | PTES_Rsp | -0.10 | 0.00 | 0.359 | 1 |
| ASBI_RE | PTES_Rsp | 0.00 | 0.00 | 1 | 1 |
| SCS_Mdf | PTES_Rsp | 0.00 | 0.10 | 0.007 | 0.385 |
| SCS_CH | PTES_Rsp | 0.00 | 0.00 | 1 | 1 |
| SCS_SK | PTES_Rsp | 0.00 | 0.00 | 1 | 1 |
| FC | PTES_Rsp | 0.00 | 0.00 | 1 | 1 |
| PTES_Und | PTES_Rsp | 0.11 | 0.00 | 0.313 | 1 |
| PTES_Care | PTES_Rsp | 0.22 | 0.29 | 0.363 | 1 |
| ASBI_Exh | PTES_Enc | 0.00 | 0.00 | 1 | 1 |
| ASBI_Cyn | PTES_Enc | 0.00 | 0.00 | 1 | 1 |
| ASBI_RE | PTES_Enc | 0.00 | 0.00 | 1 | 1 |
| SCS_Mdf | PTES_Enc | 0.12 | 0.00 | 0.076 | 1 |
| SCS_CH | PTES_Enc | 0.00 | 0.00 | 1 | 1 |
| SCS_SK | PTES_Enc | 0.00 | 0.00 | 1 | 1 |
| FC | PTES_Enc | 0.13 | 0.00 | 0.16 | 1 |
| PTES_Und | PTES_Enc | 0.14 | 0.15 | 0.887 | 1 |
| PTES_Care | PTES_Enc | 0.40 | 0.42 | 0.736 | 1 |
| PTES_Rsp | PTES_Enc | 0.30 | 0.38 | 0.218 | 1 |

*Note.* Weight 1 and weight 2 respectively indicate the edge weight in junior and senior high students’ network.

*Table S2*. The comparison of strength and expected influence across networks.

| Node | Index | Value 1 | Value 2 | *p* | Bonferroni *p* |
| --- | --- | --- | --- | --- | --- |
| ASBI_Cyn | Expected Influence | -0.07 | 0.15 | 0.606 | 1 |
| Strength | 0.80 | 0.14 | 0.141 | 1 |
| ASBI_Exh | Expected Influence | -0.70 | -0.70 | 0.705 | 1 |
| Strength | -1.22 | -0.34 | 0.618 | 1 |
| ASBI_RE | Expected Influence | -1.37 | -1.30 | 0.703 | 1 |
| Strength | 0.12 | -0.19 | 0.213 | 1 |
| FC | Expected Influence | -0.65 | -0.99 | 0.761 | 1 |
| Strength | -1.34 | -2.34 | 0.007 | 0.176 |
| PTES_Care | Expected Influence | 1.54 | 1.49 | 0.768 | 1 |
| Strength | 1.34 | 1.77 | 0.351 | 1 |
| PTES_Enc | Expected Influence | 1.55 | 1.30 | 0.339 | 1 |
| Strength | 1.38 | 0.96 | 0.345 | 1 |
| PTES_Rsp | Expected Influence | 0.30 | 0.85 | 0.042 | 1 |
| Strength | -0.55 | 0.32 | 0.786 | 1 |
| PTES_Und | Expected Influence | 0.54 | 0.34 | 0.581 | 1 |
| Strength | -0.30 | -0.41 | 0.062 | 1 |
| SCS_CH | Expected Influence | -1.29 | -1.22 | 0.715 | 1 |
| Strength | 0.49 | 0.01 | 0.362 | 1 |
| SCS_Mdf | Expected Influence | -0.36 | -0.50 | 0.9 | 1 |
| Strength | 0.51 | 0.16 | 0.457 | 1 |
| SCS_SK | Expected Influence | 0.51 | 0.57 | 0.757 | 1 |
| Strength | -1.21 | -0.08 | 0.761 | 1 |

*Note.* Value 1 and value 2 respectively indicate the value of each centrality index in junior and senior high students’ networks.


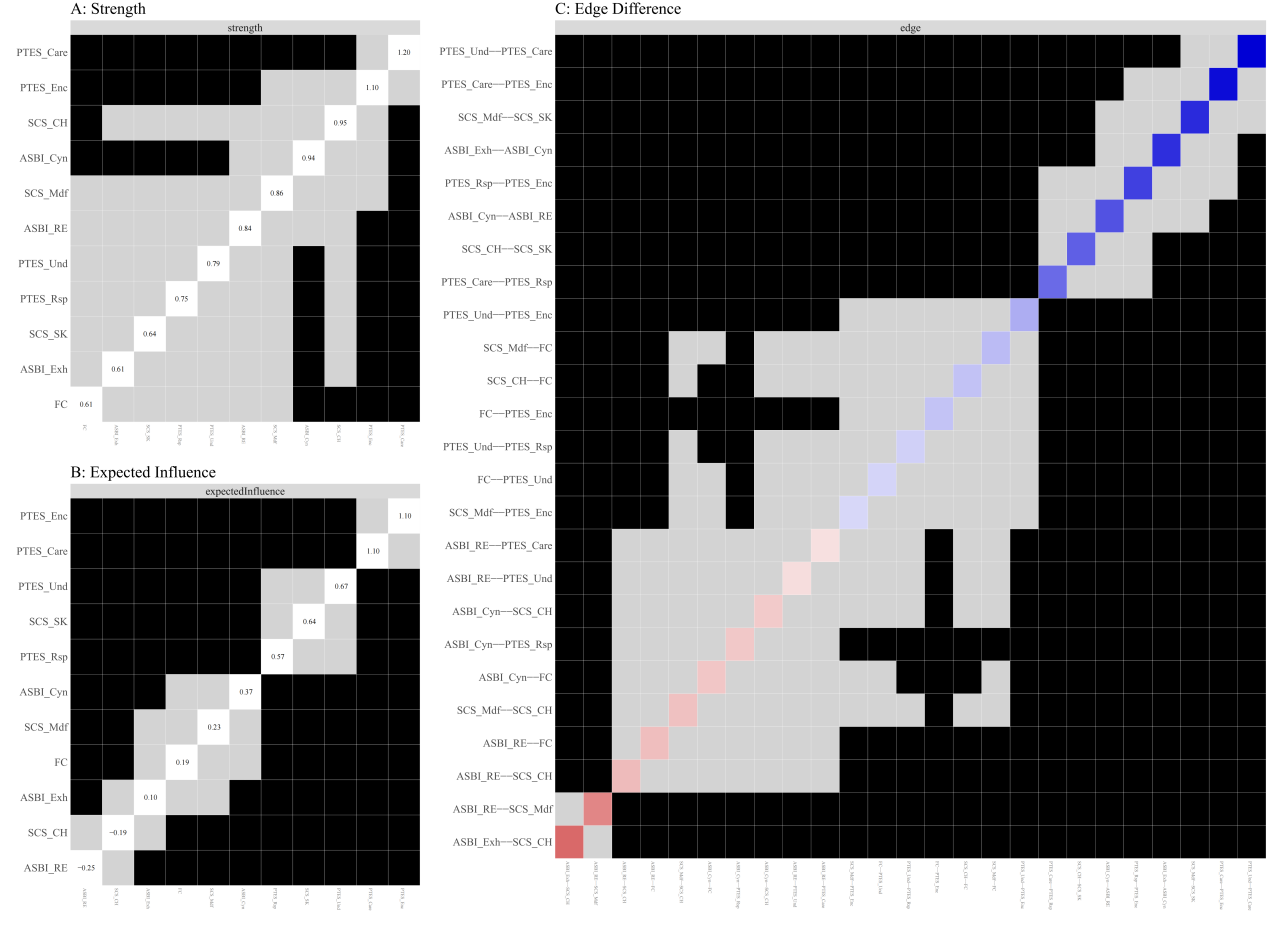


Figure S1. Comparison of nodes and edges within network.

A: Strength comparison between each pair of nodes; B: Expected influence comparison between each pair of nodes; C: Edge weight comparison between each pair of edges; black boxes indicate the difference is significant (p < 0.05).


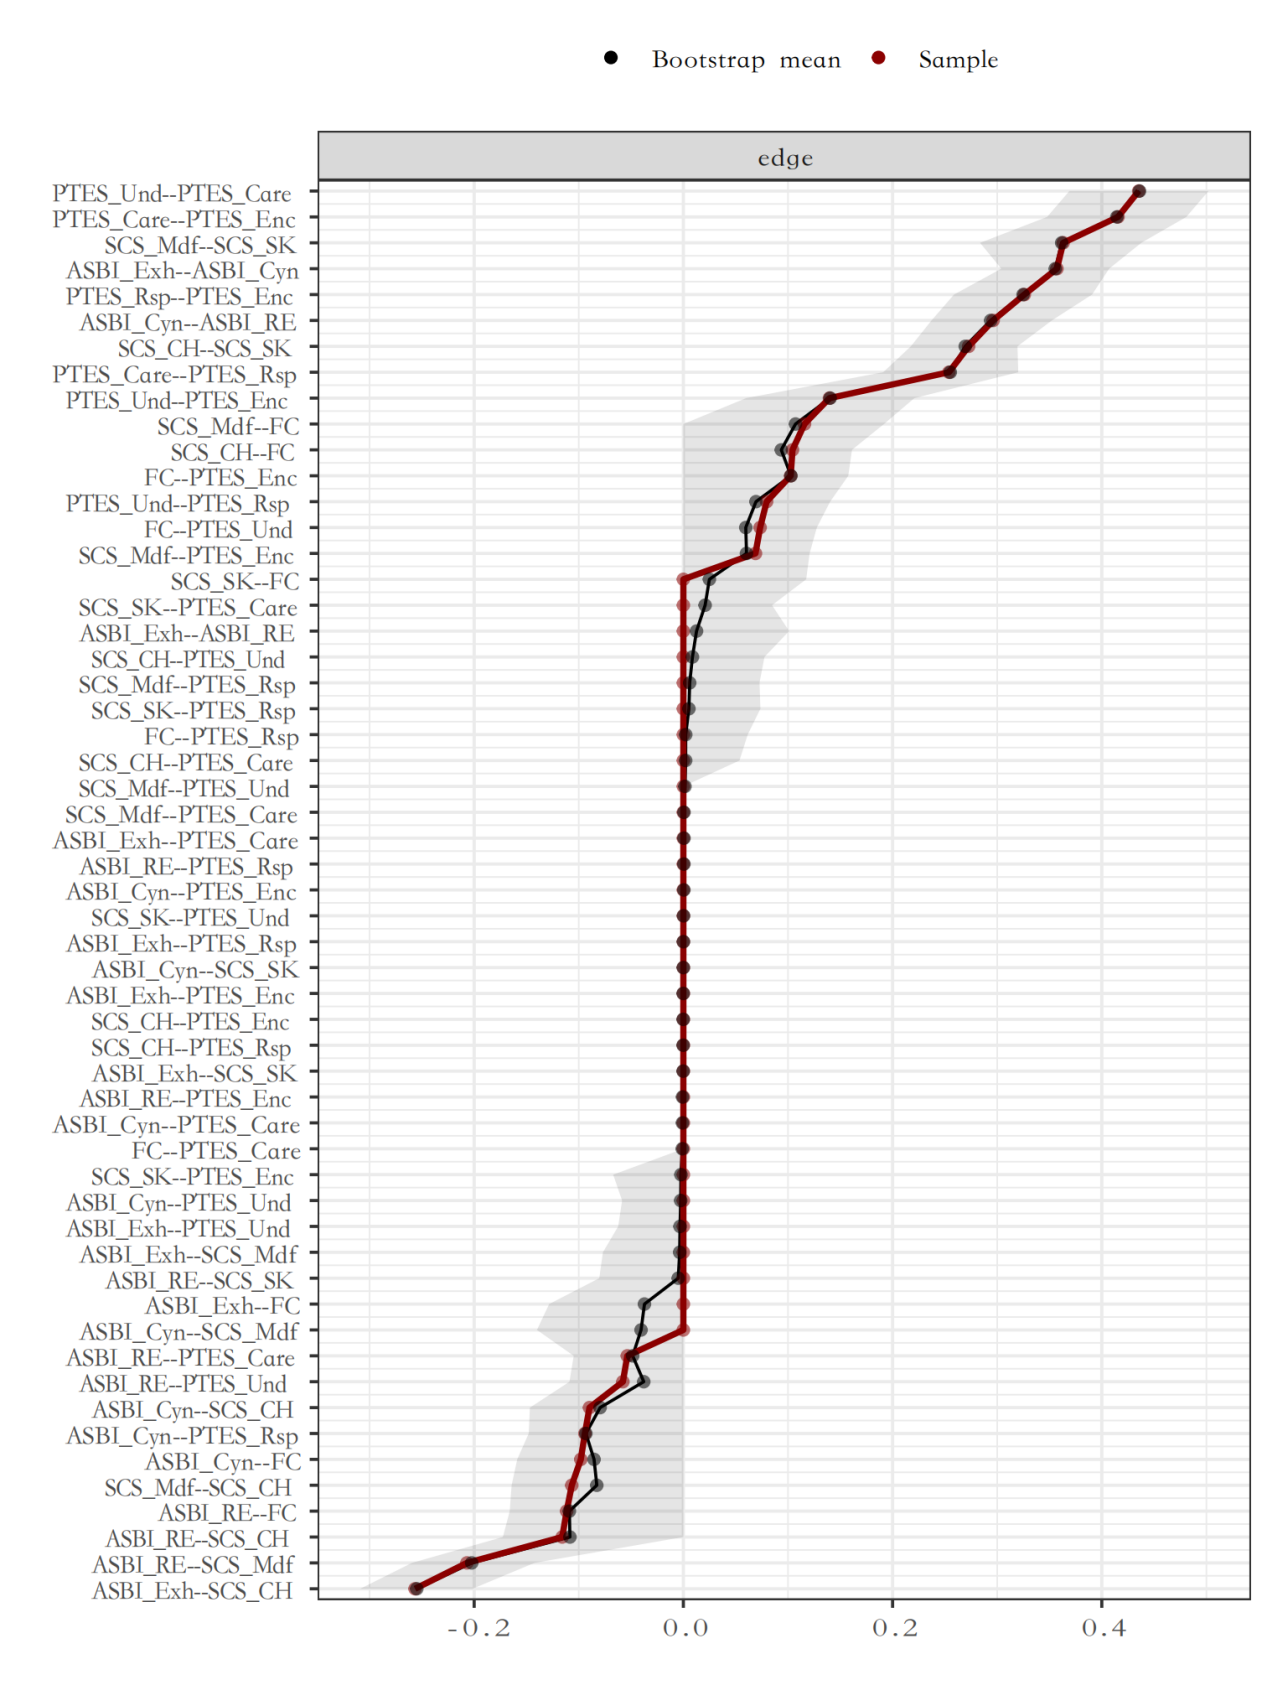


Figure S2. The accuracy of each edge in network.

*Note.* The black line represents the mean of edge weight across bootstrap samples; the red line represents the edge weight in this network; gray area represents 95% bootstrap CI.


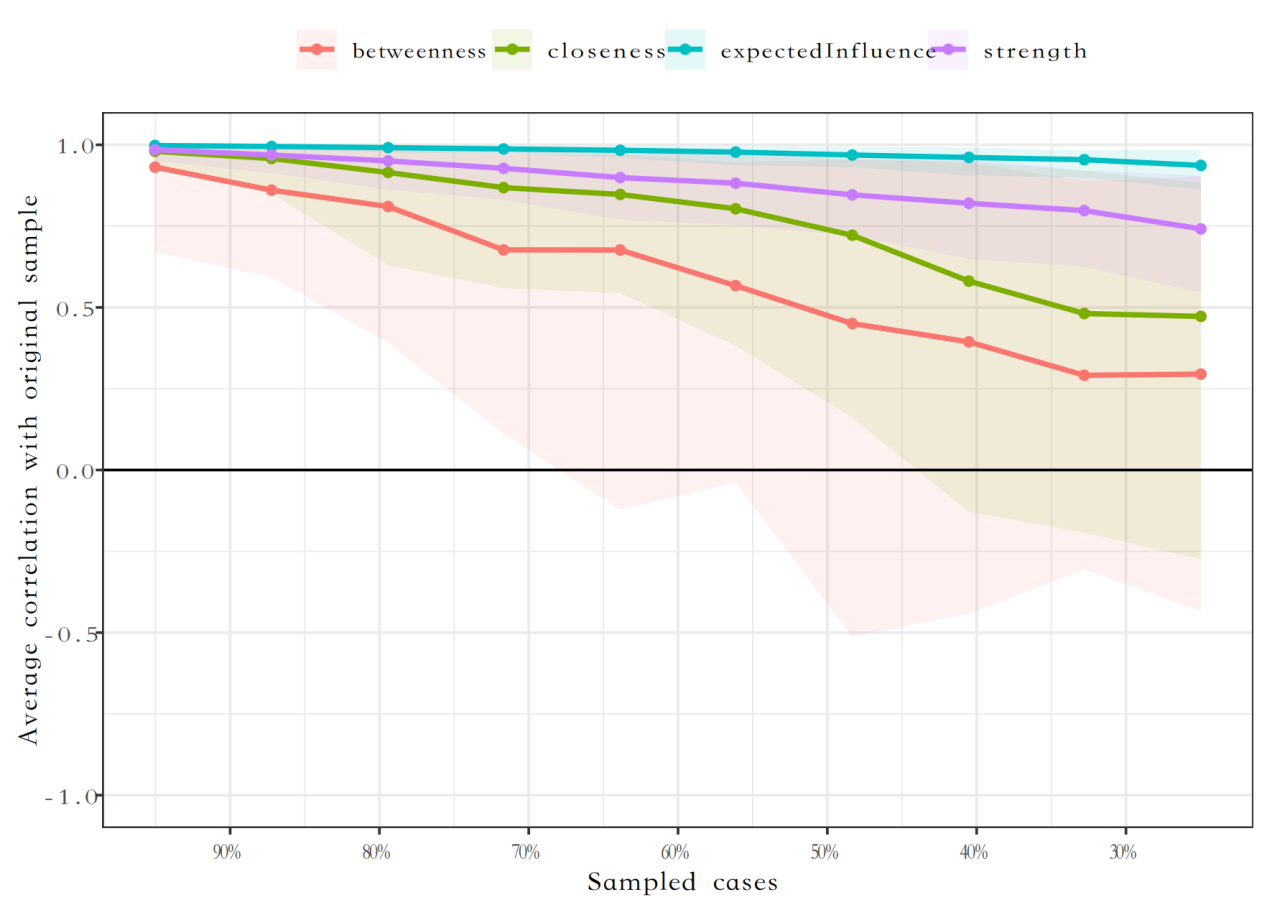


Figure S3. The stability of nodes’ centrality indices in the network.

*Note.* The x-axis represents the percentage of cases that dropped from original sample; y-axis represents the correlations between indices of original network and the network after dropping cases.


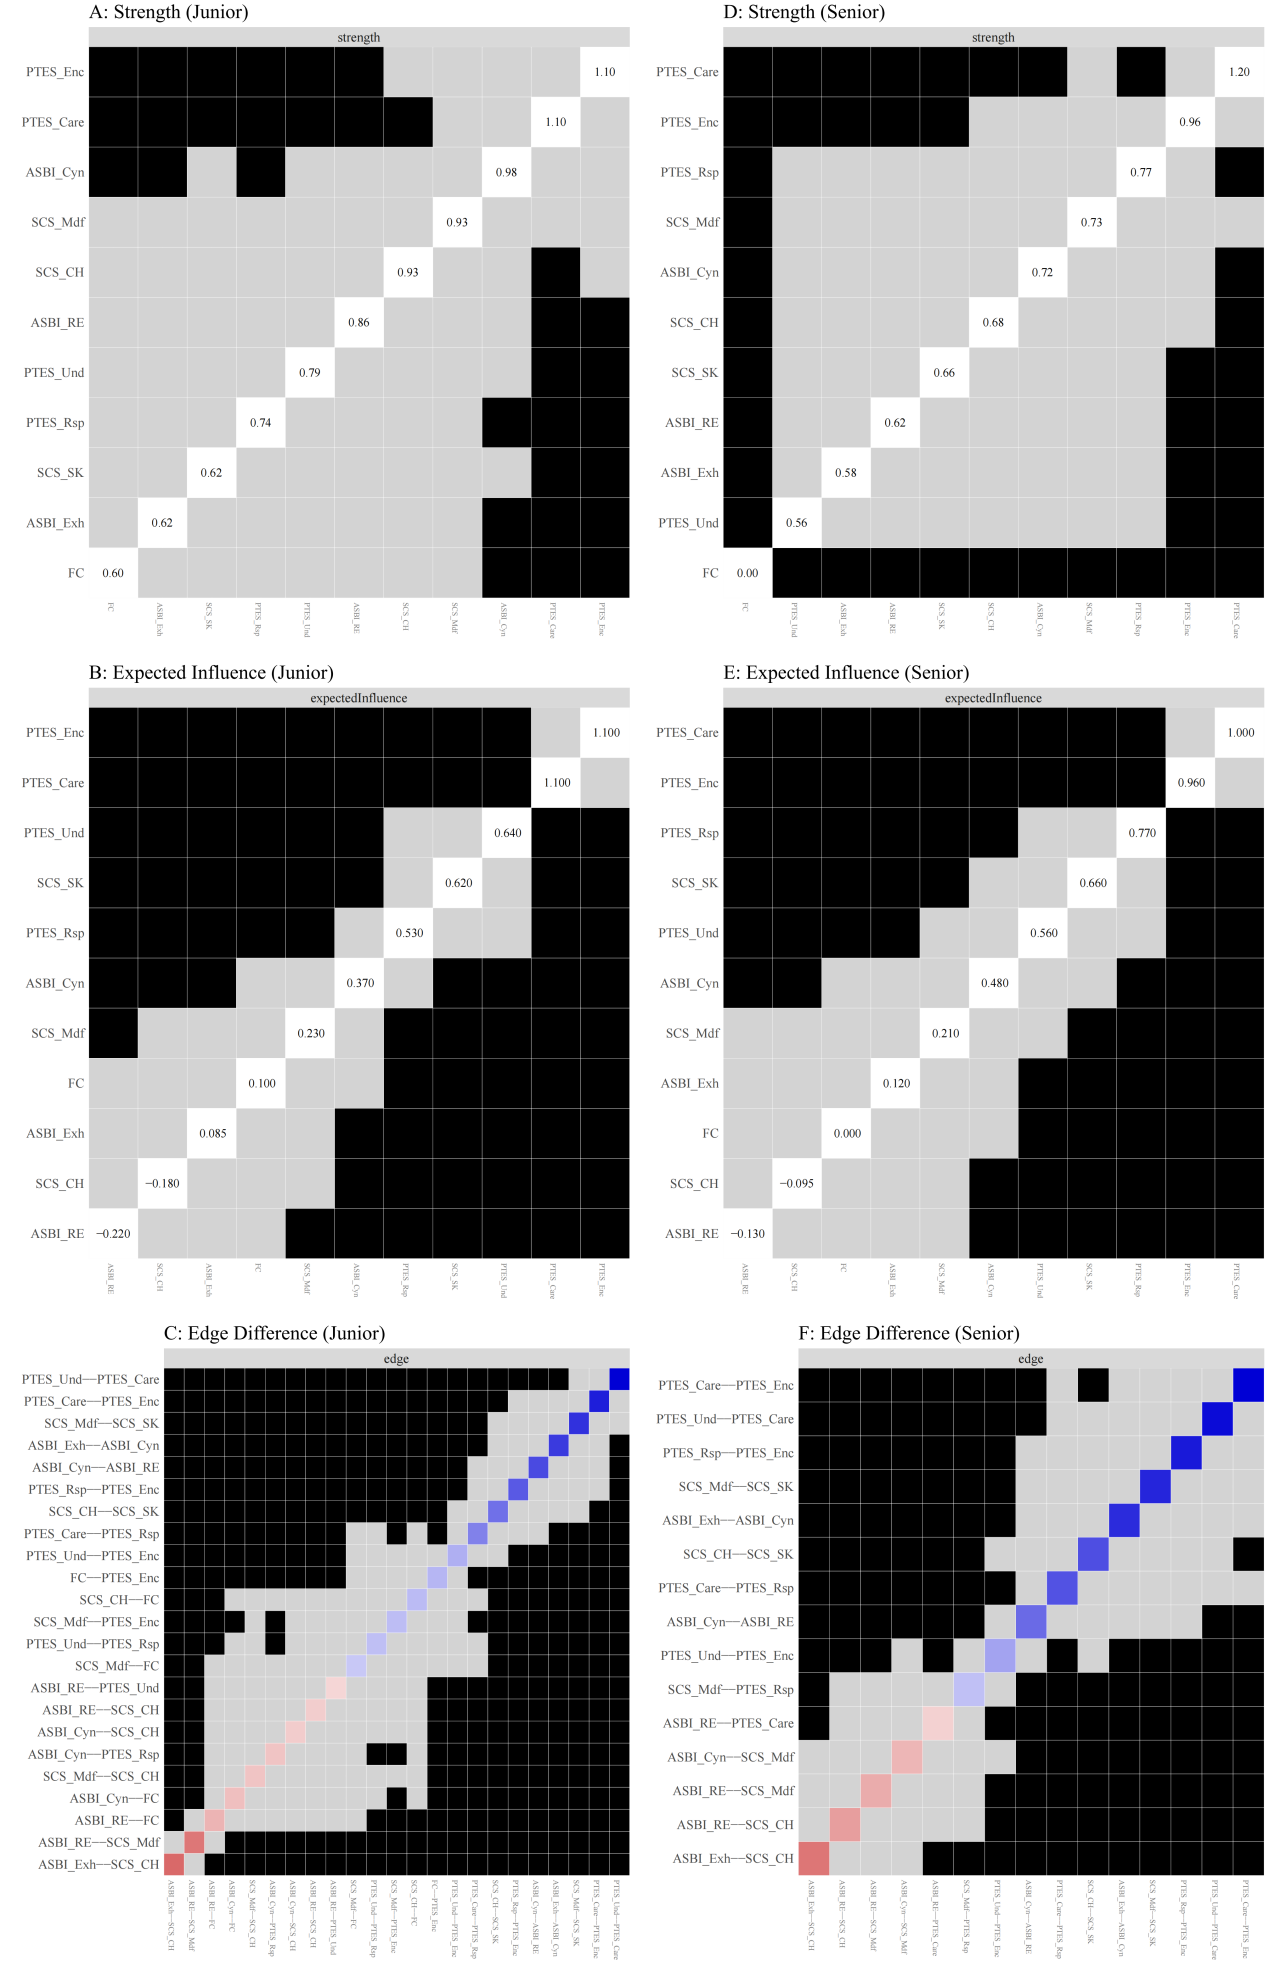


Figure S4. Comparison of each pair of nodes and edges within networks of two educational stages.

*Note.* A, B, and C respectively are the comparison of strength, expected influence indices and edge weight in junior high students’ network; D, E, and F respectively are the comparison of strength, expected influence indices and edge weight in senior high students’ network.


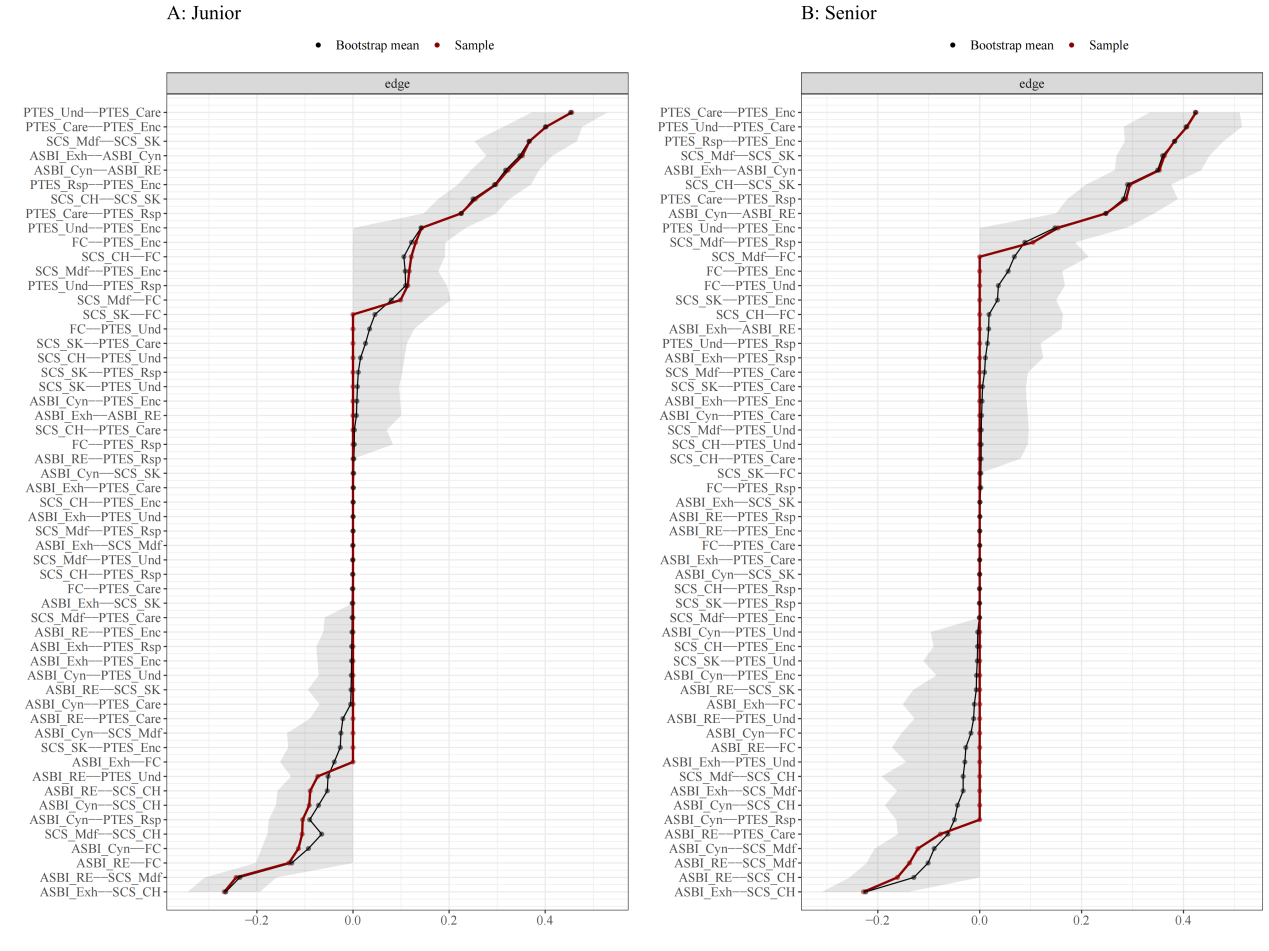


Figure S5. The accuracy of edge weights in two networks.

Note. A: The accuracy of edge weights in junior high students’ network; B: The accuracy of edge weights in senior high students’ network.


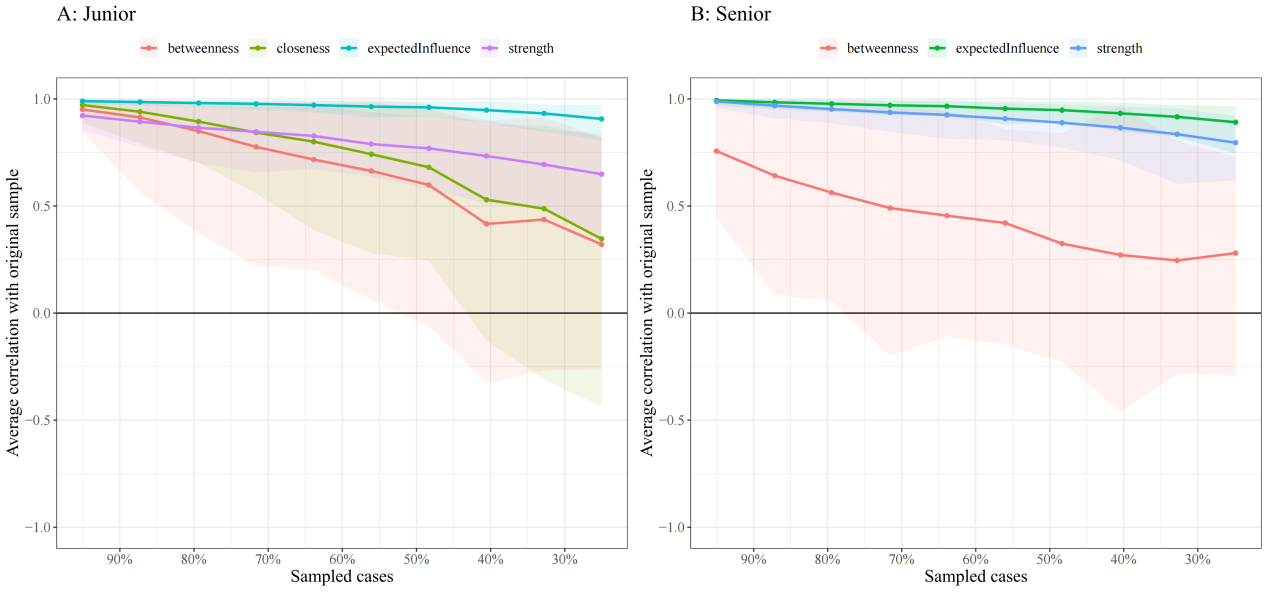


Figure S6. The stability of centrality indices in two networks.

Note. A: The stability of centrality indices in junior high students’ network; B: The stability of centrality indices in senior high studen
